---

 COMMENTS AND  
 RESPONSES
 

---

**Response to  
 Comment on: Selvin  
 et al. No Racial  
 Differences in the  
 Association of  
 Glycated  
 Hemoglobin With  
 Kidney Disease and  
 Cardiovascular  
 Outcomes. Diabetes  
 Care 2013;  
 36:2995-3001**

**W**e thank Drs. Kilpatrick and Bloomgarden (1) for their interest in our study. While we agree that the higher mean HbA<sub>1c</sub> in blacks compared with whites is well established, the collective evidence suggests that risk associations are similar. The goal of our recent study (2) was to compare the prognostic value of HbA<sub>1c</sub> to fasting glucose for risk of major complications in black and white adults. The primary conclusion of our study was that we did not observe major differences between blacks and whites in association with HbA<sub>1c</sub> and long-term clinical outcomes. First, our results suggest that HbA<sub>1c</sub> is stronger than fasting glucose as a predictor of outcomes in both whites and blacks. Second, in the only outcome (mortality) where we observed a significant difference between whites and blacks in the risk association, the interaction was present for both HbA<sub>1c</sub> and fasting glucose; the hazard ratios for all-cause mortality and undiagnosed diabetes in whites were 1.74 (95% CI

1.38–2.18) for HbA<sub>1c</sub> ≥6.5% and 1.62 (1.34–1.96) for fasting glucose ≥126 mg/dL. The corresponding weaker hazard ratios for undiagnosed diabetes in blacks were 1.38 (1.05–1.81) for HbA<sub>1c</sub> ≥6.5% and 0.99 (0.73–1.34) for fasting glucose ≥126 mg/dL.

We think that Kilpatrick and Bloomgarden's focus on only the prediabetic group (HbA<sub>1c</sub> of 5.7–6.4%) is inappropriate since power in this group is more limited. They point out that HbA<sub>1c</sub> in this range is often not associated with outcomes in blacks, but it is important to note that the prediabetic group defined by fasting glucose (100–125 mg/dL) is also not significantly associated with any of the outcomes either in blacks or whites in this study population. The group with HbA<sub>1c</sub> ≥6.5% is of greatest clinical importance, particularly when making statements about diagnosis. Furthermore, the continuous analysis provides greater power and the figure in our article strongly supports our original conclusions. Our results support the contention that the processes that lead to the higher HbA<sub>1c</sub> in blacks compared with whites reflect glycaemic factors. Indeed, blacks are known to be at higher risk for diabetes and its complications (3,4). It is likely that the racial differences in HbA<sub>1c</sub> reflect differences in diet, lifestyle, and possibly chronic exposure to higher postprandial glucose levels (5). Retinopathy, which is highly specific to diabetes, occurs at a higher prevalence in blacks compared with whites, even at the same HbA<sub>1c</sub> level (6). We find no evidence that there is anything "false" about elevations of HbA<sub>1c</sub> in blacks.

ELIZABETH SELVIN, PHD, MPH<sup>1</sup>

RICHARD BERGENSTAL, MD<sup>2</sup>

JOSEF CORESH, MD, PHD, MHS<sup>1</sup>

From the <sup>1</sup>Department of Epidemiology and the Welch Center for Prevention, Epidemiology and Clinical Research, Johns Hopkins Bloomberg

School of Public Health and the Division of General Internal Medicine, Department of Medicine, Johns Hopkins University, Baltimore, Maryland; and the <sup>2</sup>International Diabetes Center, Park Nicollet Health Services, Minneapolis, Minnesota.

Corresponding author: Elizabeth Selvin, lselvin@jhsph.edu.

DOI: 10.2337/dc13-1673

© 2013 by the American Diabetes Association. Readers may use this article as long as the work is properly cited, the use is educational and not for profit, and the work is not altered. See <http://creativecommons.org/licenses/by-nc-nd/3.0/> for details.

**Acknowledgments**—R.B. is a volunteer officer of the American Diabetes Association.

No potential conflicts of interest relevant to this article were reported.

.....

**References**

1. Kilpatrick ES, Bloomgarden ZT. Comment on: Selvin et al. No racial differences in the association of glycated hemoglobin with kidney disease and cardiovascular outcomes. *Diabetes Care* 2013;36:2995–3001 (Letter). *Diabetes Care* 2013;36:e215. DOI: 10.2337/dc13-1371
2. Selvin E, Rawlings AM, Bergenstal RM, Coresh J, Brancati FL. No racial differences in the association of glycated hemoglobin with kidney disease and cardiovascular outcomes. *Diabetes Care* 2013;36:2995–3001
3. Brancati FL, Whelton PK, Kuller LH, Klag MJ. Diabetes mellitus, race, and socioeconomic status. A population-based study. *Ann Epidemiol* 1996;6:67–73
4. Young BA, Maynard C, Boyko EJ. Racial differences in diabetic nephropathy, cardiovascular disease, and mortality in a national population of veterans. *Diabetes Care* 2003;26:2392–2399
5. Selvin E, Steffes MW, Ballantyne CM, Hoogeveen RC, Coresh J, Brancati FL. Racial differences in glycaemic markers: a cross-sectional analysis of community-based data. *Ann Intern Med* 2011;154:303–309
6. Bower JK, Brancati FL, Selvin E. No ethnic differences in the association of glycated hemoglobin with retinopathy: the National Health and Nutrition Examination Survey 2005–2008. *Diabetes Care* 2013;36:569–573
